# Supplementary figures and images for: CD19-CAR T-cell therapy induces deep tissue depletion of B cells
Source: HighWire-hosted journal article supplement (doi:10.1136/ard-2024-226142), 2024-08-17

## Supplementary Figure 2

A

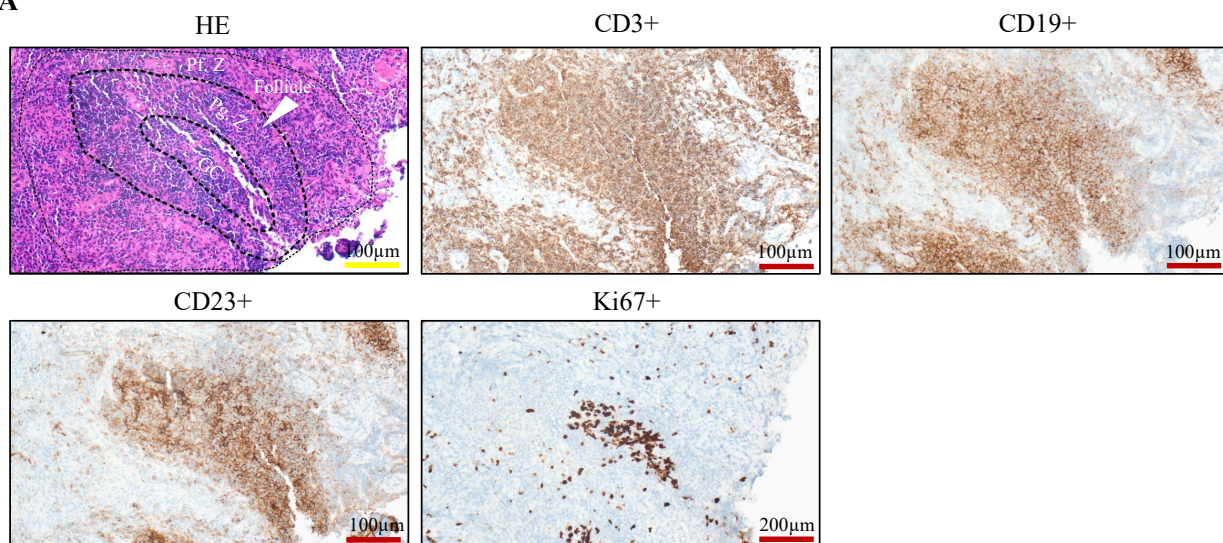

Supplement: ard-2024-226142supp003_data_supplement.pdf [file ard-2024-226142supp003_data_supplement.pdf]
